# Supplementary material
Source: HighWire-hosted journal article supplement (https://bmjopen.bmj.com/content/12/5/e056492)
Supplement: inline-supplementary-material-1 [file inline-supplementary-material-1.pdf]

## APPENDIX B: SEARCH STRINGS

### PubMed/MEDLINE

"borderline personality disorder"[MeSH Terms] AND "borderline personality disorder"[Title/Abstract]

AND

("suicide"[MeSH Terms] OR "suicid\*"[Text Word] OR "attempted suicide"[Text Word] OR "deliberate self harm"[Text Word] OR "self injurious behavior"[MeSH Terms] OR "self mutilation"[MeSH Terms] OR "self injur\*"[Text Word] OR "self mutil\*"[Text Word] OR "self poison\*"[Text Word] OR "suicidal ideation"[MeSH Terms] OR "death wish"[Text Word] OR "passive suicidal ideation"[Text Word])

### SCOPUS

TITLE-ABS-KEY ( "borderline personality disorder" )

AND

TITLE-ABS-KEY ( suicid\* OR "attempted suicide" OR "deliberate self-harm" OR "self-injurious behavior" OR self-mutilation OR self-injur\* OR self-mutil\* OR self-poison\* OR "suicidal ideation" OR "death wish" OR "passive suicidal ideation" )

## Web Of Science

TS=("borderline personality disorder")

AND

TS=(suicid\* OR "attempted suicide" OR "deliberate self-harm" OR "self-injurious behavior" OR self-mutilation OR self-injur\* OR self-mutil\* OR self-poison\* OR "suicidal ideation" OR "death wish" OR "passive suicidal ideation")

## Embase

'borderline state'/exp AND 'borderline personality disorder':ti,ab,kw

AND

('suicide'/exp OR 'suicidal ideation'/exp OR 'suicidal behavior'/exp OR 'suicide attempt'/exp OR 'automutilation'/exp OR 'self poisoning'/exp) AND (suicid\*:ti ,ab,kw OR 'deliberate self harm':ti,ab,kw OR 'self injurious behavior':ti,ab,kw OR 'self mutilation':ti,ab,kw OR 'self injur\*':ti,ab,kw OR 'self mutil\*':ti,ab,kw OR 'self poison\*':ti,ab,kw OR 'death wish':ti,ab,kw OR 'passive suicidal ideation':ti,ab,kw)

## PsycINFO

if(Borderline Personality Disorder) AND tiab("borderline personality disorder")

AND

if(Suicide OR Attempted Suicide OR Self-Injurious Behavior OR Self-Mutilation OR Suicidal Ideation) AND tiab(suicid\* OR "attempted suicide" OR "deliberate self-harm" OR "self-injurious behavior" OR "self-mutilation" OR self-injur\* OR self-mutil\* OR self-poison\* OR "suicidal ideation" OR "death wish" OR "passive suicidal ideation")

### **CINAHL Complete**

MH borderline personality disorder AND TX "borderline personality disorder"

AND

MH ( suicide OR suicide attempt OR deliberate self harm OR self-injurious behavior OR self mutilation OR suicidal ideation OR death wish OR passive suicidal ideation ) AND TX ( suicid\* OR "attempted suicide" OR "deliberate self-harm" OR "self-injurious behavior" OR self-mutilation OR self-injur\* OR self-mutil\* OR self-poison\* OR "suicidal ideation" OR "death wish" OR "passive suicidal ideation" )

### **Cochrane Library**

"borderline personality disorder" in Title Abstract Keyword

AND

Suicide OR Suicide Attempt OR Deliberate Self Harm OR Self Injurious Behavior OR Self Mutilation OR Suicidal Ideation in Title Abstract Keyword AND suicid\* OR "attempted suicide" OR "deliberate self-harm" OR "self-injurious behavior" OR self-mutilation OR self-injur\* OR self-mutil\* OR self-poison\* OR "suicidal ideation" OR "death wish" OR "passive suicidal ideation" in Title Abstract Keyword
